# Supplementary material for: Venezuelan Equine Encephalitis Virus in Iquitos, Peru: Urban Transmission of a Sylvatic Strain
Source: PubMed Central journal article supplement (PMC2593782; doi:10.1371/journal.pntd.0000349), 2008-12-16

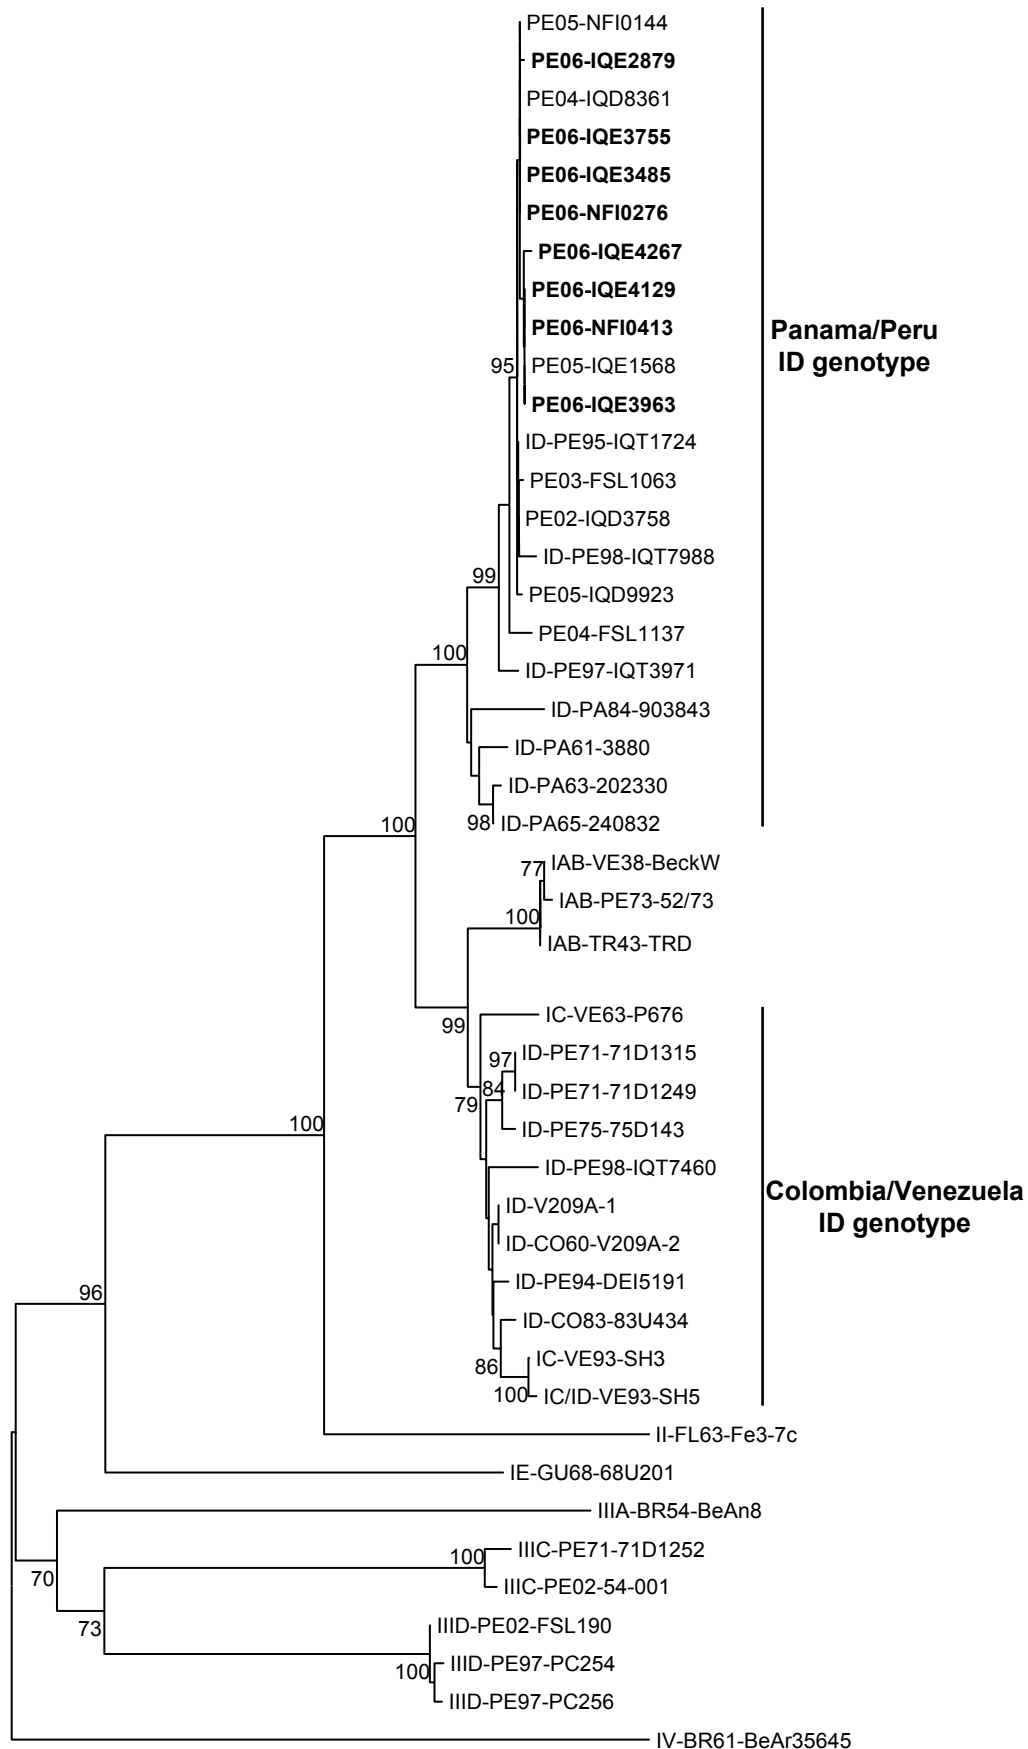

Supplement: pntd.0000349.s002.pdf [file pntd.0000349.s002.pdf]
